# Supplementary material for: A fluorescein semicarbazide-based fluorescent probe for highly selective and rapid detection of hypochlorite in aqueous solution
Source: Royal Society of Chemistry journal article supplement (doi:10.1039/c2ay26230d), 2012-01-01
Supplement: c2ay26230d.pdf [file c2ay26230d.pdf]

## Electronic Supporting Information

for

### A fluoresceinsemicarbazide-based fluorescent probe for highly-selective and rapid detection of hypochlorite in aqueous solution

Xuan Zhang\*, Yuxia Zhang and Zhijia Zhu

*College of Chemistry, Chemical Engineering & Biotechnology, and National Engineering Research Center for Dyeing and Finishing of Textiles, Donghua University, Shanghai 201620, China.*

*e-mail: xzhang@dhu.edu.cn*

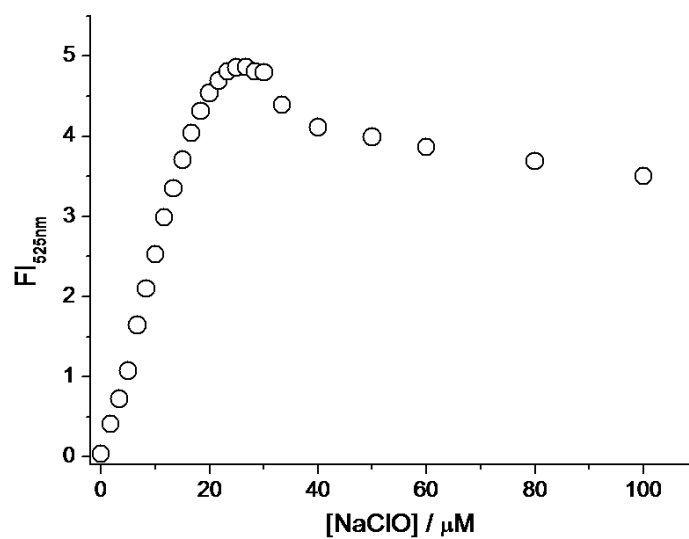

**Figure S1.** The plot of fluorescence intensity (525 nm) of **1** (10  $\mu\text{M}$ ) to NaClO concentration in 10 mM PBS buffer solution (pH = 7.4).

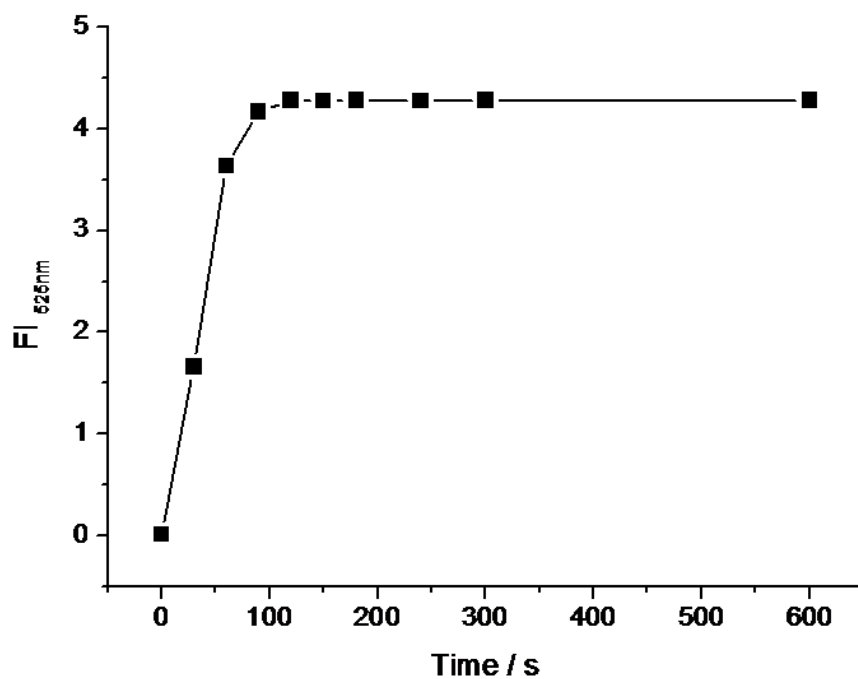

**Figure S2.** Time dependent of fluorescence intensity (525 nm) of **1** (10  $\mu\text{M}$ ) in the presence of 3equiv of NaClO, 10 mM PBS buffer solution (pH = 7.4).

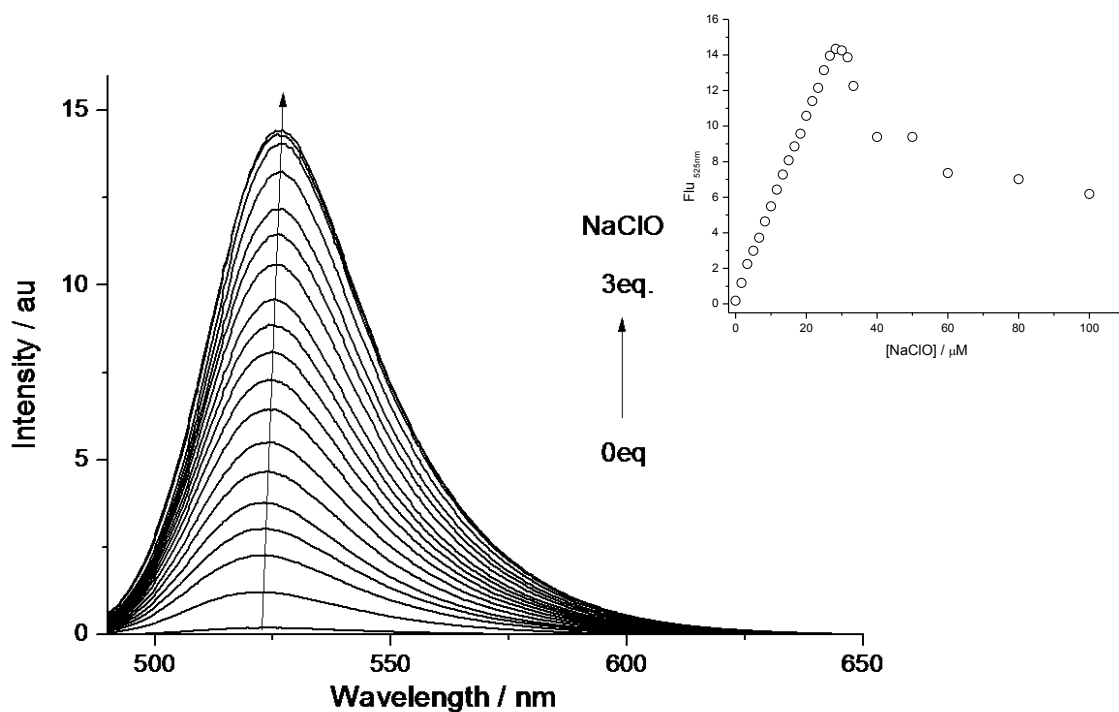

**Figure S3** Fluorescence titration of **2** (10  $\mu\text{M}$ ) with NaClO in 10 mM PBS buffer solution (pH = 7.4). Inset is the plot of fluorescence intensity at 525 nm to NaClO concentration.

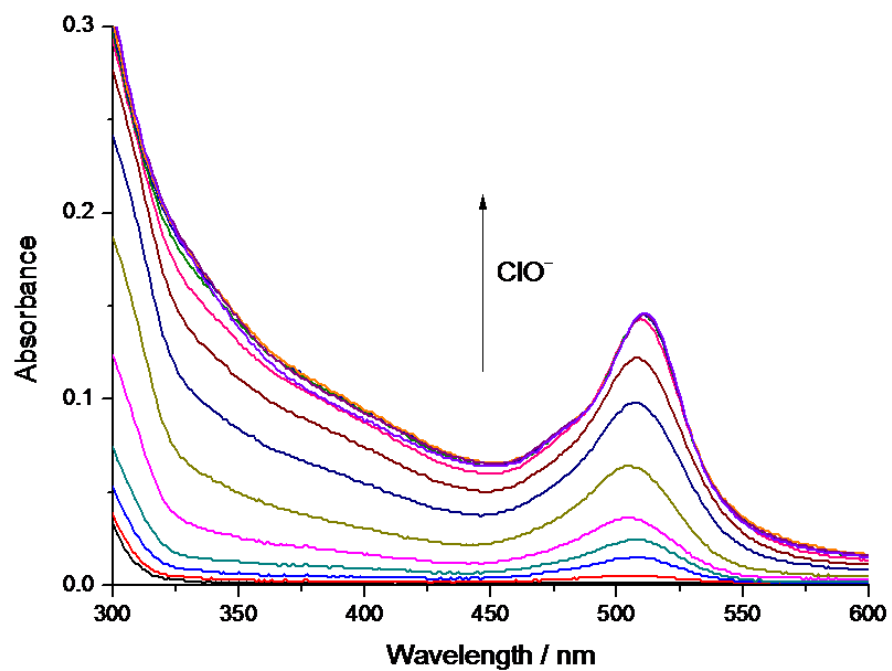

**Figure S4** Absorption titration of **1** (40 μM) with NaClO in 10 mM PBS buffer solution (pH = 7.4).

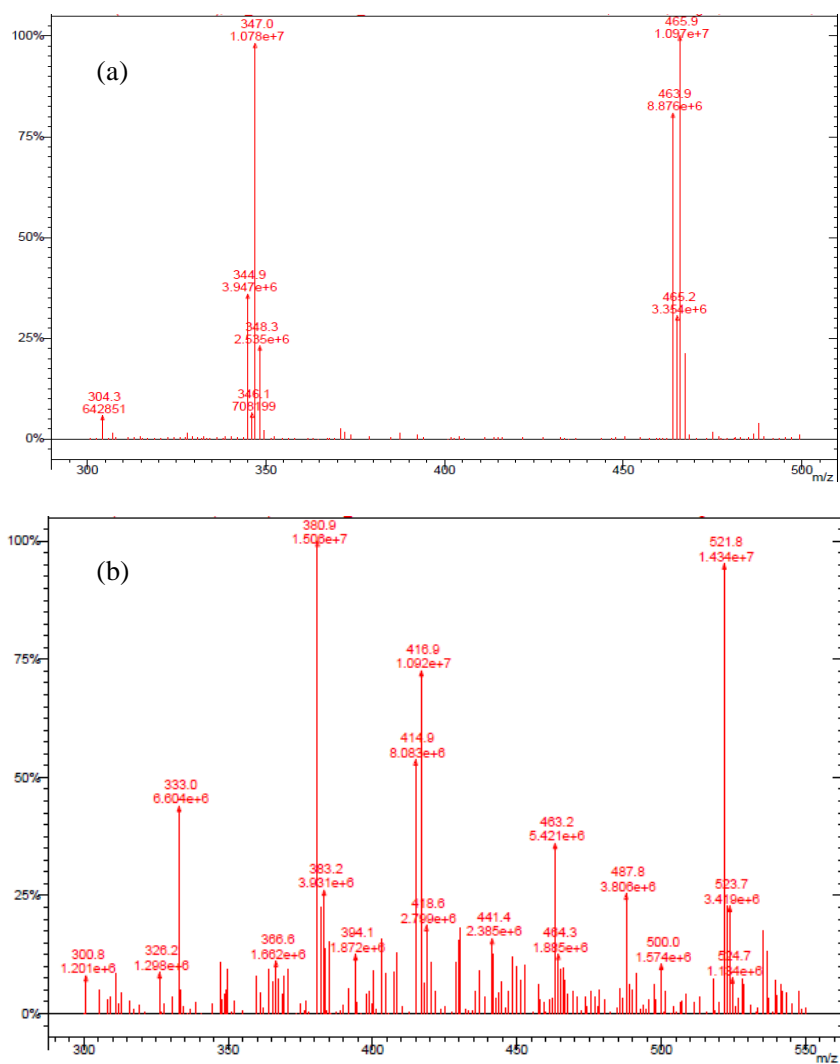

**Figure S5.** ESI-MS spectra of 10  $\mu\text{M}$  **1** (a) and its mixture with 3 equiv of NaClO (b) in water (pH = 7.4).

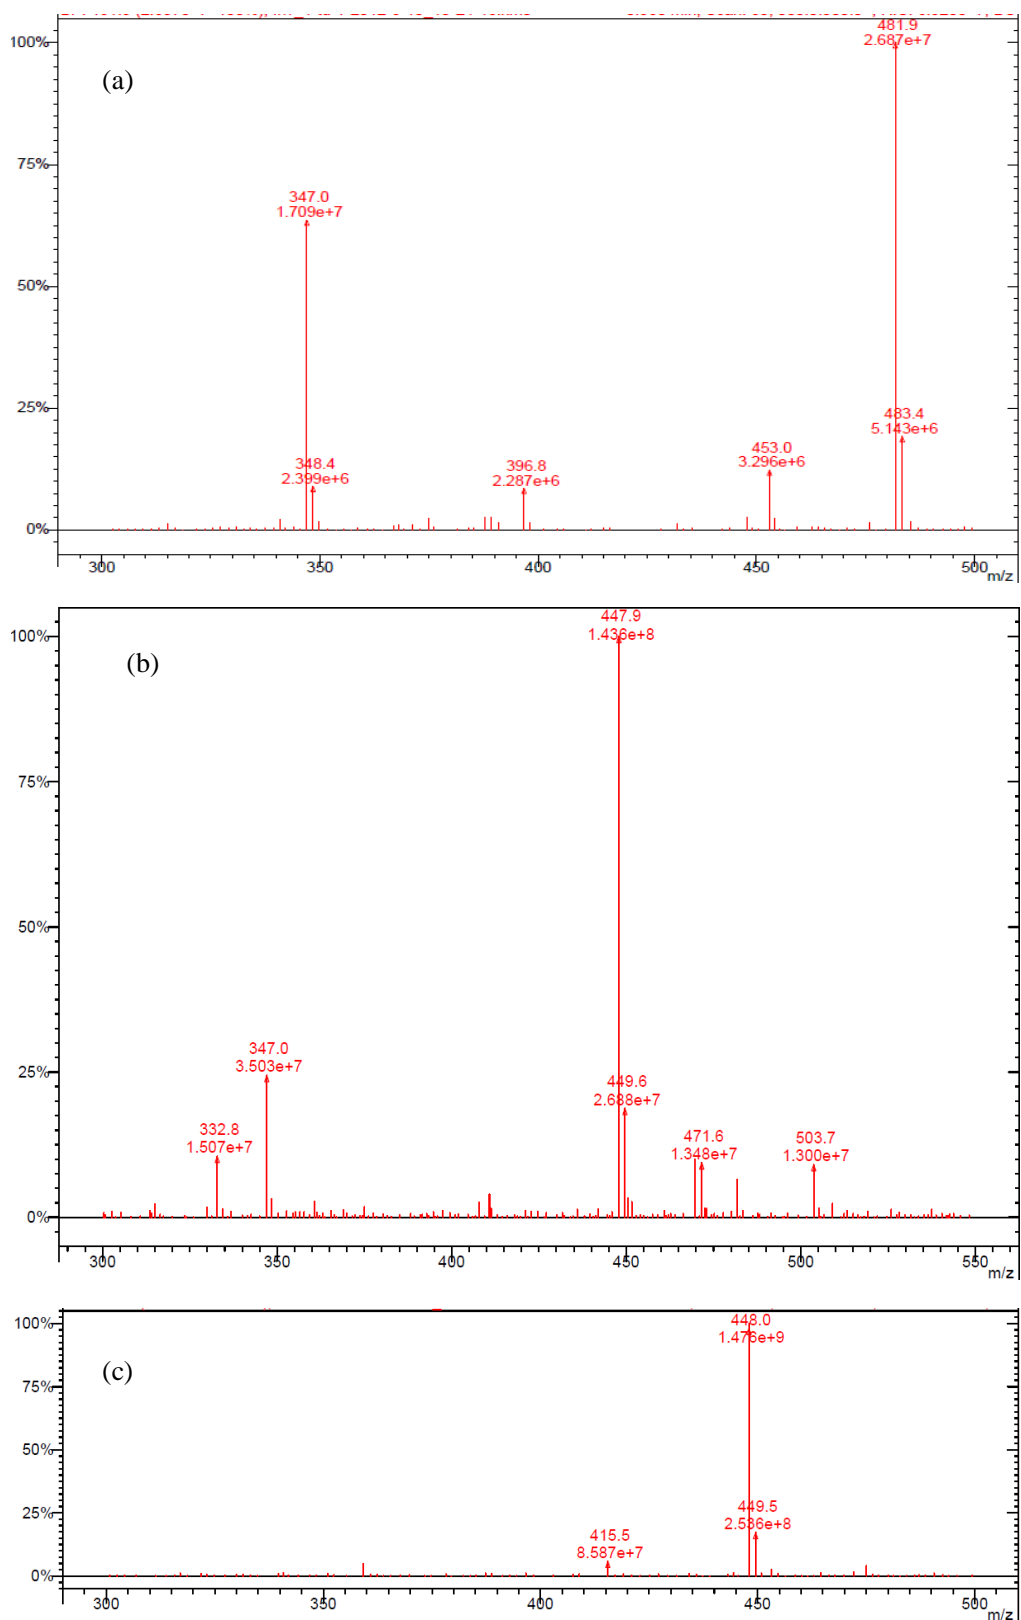

**Figure S6.** ESI-MS spectra of 10  $\mu\text{M}$  2 (a), its mixture with 3 equiv of NaClO (b) and 10 equiv of  $\text{Hg}(\text{ClO}_4)_2$  in water (pH = 7.4).

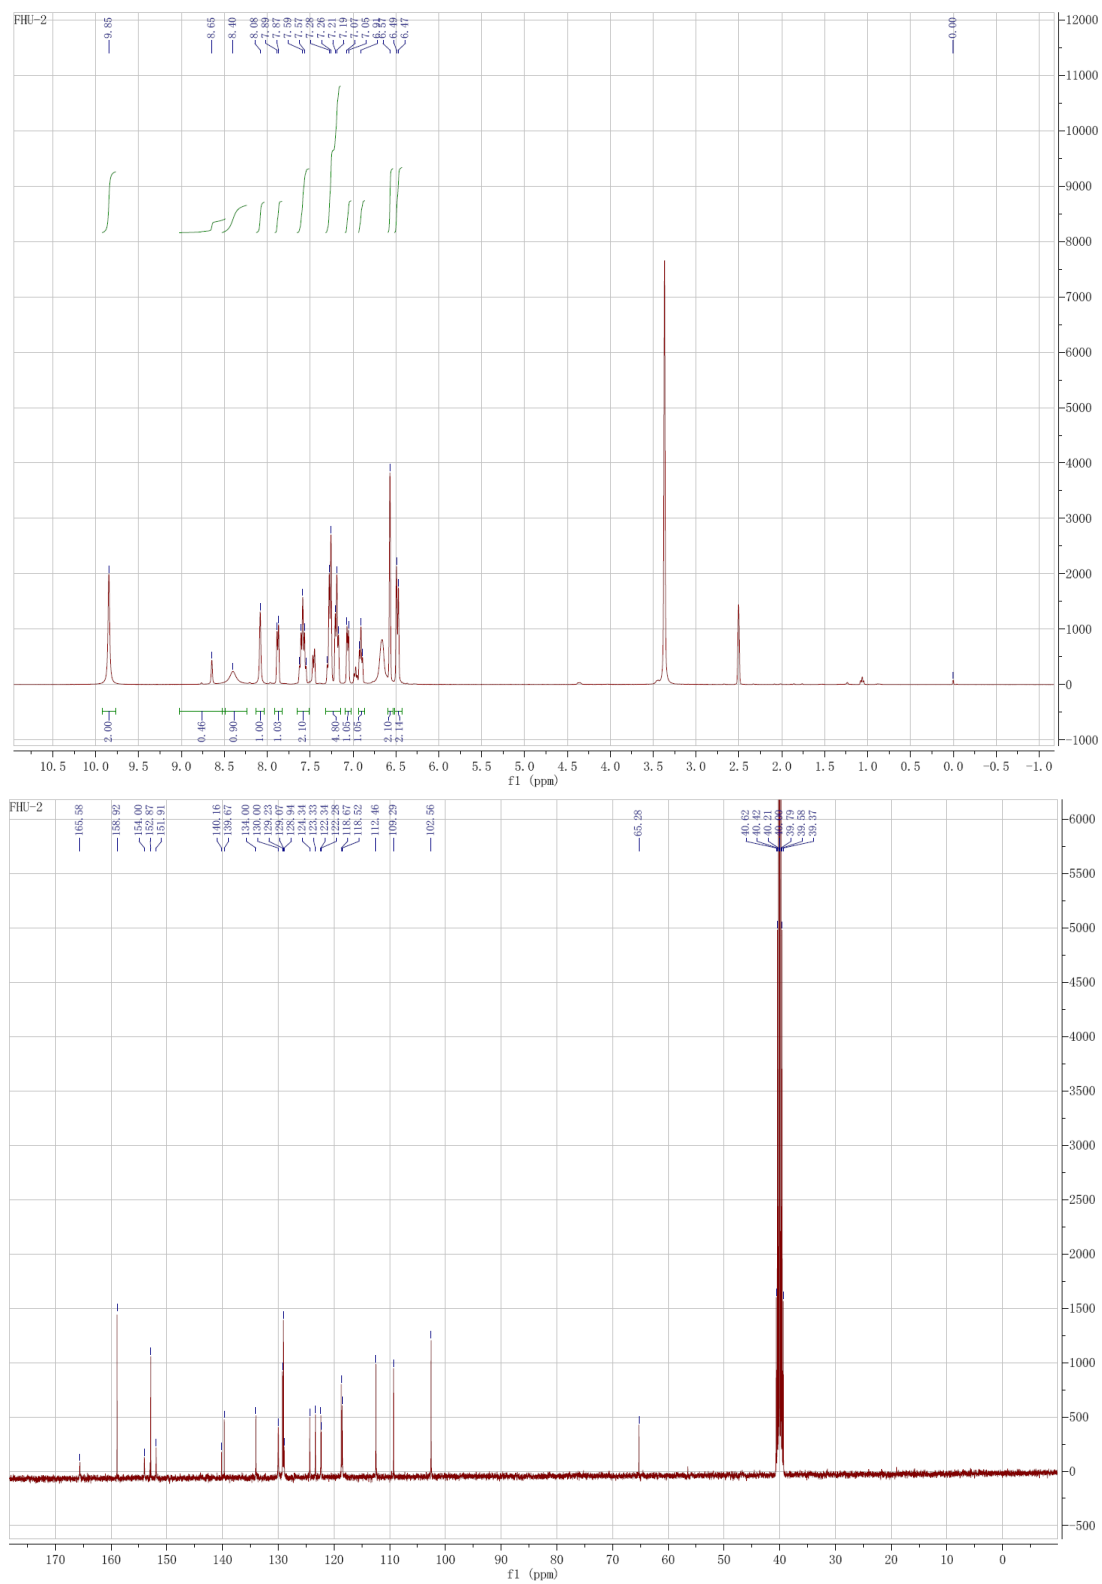

**Figure S7.** <sup>1</sup>H NMR and <sup>13</sup>C NMR spectra of **1** obtained from DMSO-d<sub>6</sub>.
